# Supplementary material for: Association of Dietary Patterns Derived Using Reduced‐Rank Regression With Subclinical Cardiovascular Damage According to Generation and Sex in the STANISLAS Cohort
Source: PubMed Central journal article supplement — J Am Heart Assoc. 2020 Mar 21;9(7):e013836. doi: 10.1161/JAHA.119.013836 (PMC7428593; doi:10.1161/jaha.119.013836), 2020-03-21
Supplement: JAH3-9-e013836-s001.pdf [file JAH3-9-e013836-s001.pdf]

# **SUPPLEMENTAL MATERIAL**

**Table S1. Compositions of the selected 41 food groups.**

| <b>Food group</b>                                | <b>Food items</b>                                                           |
|--------------------------------------------------|-----------------------------------------------------------------------------|
| <b>Vegetables</b>                                | Pepper                                                                      |
|                                                  | Tomatoes (including tomato sauce but not tomato juice)                      |
|                                                  | Carrots                                                                     |
|                                                  | Salad                                                                       |
|                                                  | Green leafy vegetables (e.g., spinach, chard)                               |
|                                                  | All cabbages (e.g., cauliflower, broccoli, brussels sprouts)                |
|                                                  | Other vegetables (eggplant, mushrooms, zucchini, onion, leek)               |
|                                                  | Avocado                                                                     |
|                                                  | Canned or jarred vegetables (except tomatoes and beans)                     |
|                                                  | Olives in all forms                                                         |
| <b>Soups</b>                                     | Vegetable soup without meat (homemade, frozen, or canned)                   |
|                                                  | Vegetable soup with meat (homemade, frozen, or canned)                      |
| <b>Fruits</b>                                    | Citrus fruits (e.g., oranges, mandarins, grapefruit, tangerines)            |
|                                                  | Red fruits (strawberries, raspberries, blackberries, blueberries, currants) |
|                                                  | Kiwifruit                                                                   |
|                                                  | Bananas                                                                     |
|                                                  | Pears, apples, pineapples, watermelons, melons, lychees                     |
|                                                  | Plums, grapes, cherries, nectarines, peaches, apricots                      |
|                                                  | Figs, dates, prunes, dried apricots                                         |
| <b>Potatoes</b>                                  | Potatoes (e.g., plain, steamed, mashed)                                     |
| <b>Other starchy foods</b>                       | Pasta, rice, bulgur, semolina                                               |
| <b>White bread and toast</b>                     | Sliced white bread, toast bread, sandwich bread                             |
|                                                  | French baguettes                                                            |
|                                                  | Rusks, rice cakes, Krisprolls, crispbread                                   |
| <b>Breakfast cereals</b>                         | Unsweetened cereals (e.g., plain cornflakes, All-Bran, Fitness)             |
|                                                  | Sweetened cereals (with honey or chocolate), puffed cereals                 |
|                                                  | Muesli                                                                      |
| <b>High-fiber bread</b>                          | Sliced special bread (cereal, rye, wholemeal)                               |
|                                                  | Special bread : french baguette type                                        |
| <b>Milk</b>                                      | Whole milk                                                                  |
|                                                  | Semiskimmed milk                                                            |
|                                                  | Skimmed milk                                                                |
|                                                  | Flavored milk (e.g. strawberry, chocolate)                                  |
|                                                  | Plain soy milk or soy products                                              |
|                                                  | Flavored soy milk or soy products                                           |
|                                                  | Milk kefir                                                                  |
| <b>Yogurts and other types of fermented milk</b> | Whole-milk yogurts (creamy and velvety yogurts), plain or with sweeteners   |
|                                                  | Whole-milk yogurts (creamy and velvety yogurts), sweetened or with fruit    |
|                                                  | Lean yogurts (0%), plain or with sweeteners                                 |
|                                                  | Lean yogurts (0%), sweetened or with fruit                                  |

|                                           |                                                                         |
|-------------------------------------------|-------------------------------------------------------------------------|
|                                           | Flavored fermented milk (Actimel, Danacol)                              |
|                                           | Light fermented milk (Actimel, Danacol)                                 |
|                                           | White cheese (beaten or faisselle)                                      |
|                                           | White cheese with fruit or sweetened (beaten or faisselle)              |
| <b>Fat cheeses</b>                        | Soft cheese                                                             |
|                                           | Hard and blue cheeses                                                   |
| <b>Light cheeses</b>                      | Cream cheese, cheese spread, melted cheese                              |
|                                           | Low-fat cream cheese, cheese spread, melted cheese                      |
|                                           | Low-fat soft cheese                                                     |
|                                           | Low-fat hard and blue cheese                                            |
| <b>Meat</b>                               | Pork fillet, roast beef, chicken breast, turkey                         |
|                                           | Beef steak, veal breast, pork chops, whole chicken                      |
|                                           | Lamb breast, meatballs, sausage, mutton                                 |
|                                           | Giblets                                                                 |
|                                           | Game                                                                    |
|                                           | Unprocessed cold cuts (e.g., cooked ham, sliced chicken)                |
|                                           | Smoked unprocessed cold cuts (e.g., bacon)                              |
| <b>Fatty fish</b>                         | Salmon, herring                                                         |
|                                           | Smoked fish (e.g., salmon, trout)                                       |
|                                           | Canned fish in oil (tuna, anchovies)                                    |
| <b>Lean fish</b>                          | White fish (cod, whiting, hake)                                         |
|                                           | Crustaceans, molluscs (shrimps, squid, oysters)                         |
|                                           | Mussels                                                                 |
| <b>Eggs</b>                               | Eggs (not eggs included in cakes or other baked products)               |
| <b>Legumes</b>                            | Lentils, chickpeas, white beans, peas                                   |
| <b>Oleaginous fruits</b>                  | Salty oleaginous fruits (e.g., peanuts, pistachios, sunflower seeds)    |
|                                           | Nuts                                                                    |
|                                           | Other unsalted oleaginous fruits (e.g., almonds, hazelnuts, pistachios) |
| <b>Olive and omega-3-rich oils</b>        | Olive oil                                                               |
|                                           | Rapeseed oil, walnut oil, soybean oil                                   |
| <b>Omega-6-rich oil</b>                   | Sunflower oil, peanut oil, corn oil                                     |
| <b>Fresh cream</b>                        | Fresh cream                                                             |
|                                           | Light cream, soy cream                                                  |
| <b>Margarine and low-fat spreads</b>      | Margarine for cooking or spreading (e.g., Planta Fin, Primevère)        |
|                                           | Margarine for cooking or spreading (e.g., St Hubert Omega 3, ProActive) |
|                                           | Low-fat butter                                                          |
|                                           | Milk fat reduced to 15% fat                                             |
|                                           | Milk fat reduced to 40% fat                                             |
| <b>Fats rich in saturated fatty acids</b> | Butter                                                                  |
|                                           | Fat for cooking or spreading (e.g., le Fleurier, Astra)                 |
| <b>Water</b>                              | Water                                                                   |
| <b>Alcoholic beverages</b>                | Nonalcoholic beer                                                       |

|                        |                                                                               |
|------------------------|-------------------------------------------------------------------------------|
|                        | Low-alcohol beer                                                              |
|                        | Beers                                                                         |
|                        | Aperitifs                                                                     |
|                        | Premixed drinks (e.g., Bacardi Breezer)                                       |
|                        | Strong alcoholic drinks (e.g., whiskey, vodka, gin)                           |
| <b>Wine</b>            | Wine (e.g., white, red, sparkling, cider)                                     |
| <b>Juice</b>           | Fruit juice (fresh, in can, in bottle, in brick)                              |
|                        | Vegetable juice (fresh, in can, in bottle, in brick)                          |
| <b>Sodas</b>           | Standard sodas (lemonade, flavored water, cola, syrup)                        |
|                        | Light sodas                                                                   |
| <b>Tea and coffee</b>  | Coffee and decaffeinated coffee                                               |
|                        | Tea                                                                           |
|                        | Herbal tea, infusions                                                         |
| <b>Processed meat</b>  | Meat preparations (e.g., nuggets, breaded meat)                               |
|                        | Processed cold cuts (rillette, dry sausage, French pâté)                      |
|                        | Salads with chicken or fish                                                   |
| <b>Fast food</b>       | Pizza                                                                         |
|                        | Quiches with meat or fish                                                     |
|                        | Hamburgers                                                                    |
|                        | Spring rolls                                                                  |
|                        | Cheese croquettes, cheese rolls                                               |
| <b>Cooked dishes</b>   | Sauerkraut                                                                    |
|                        | Cassoulet                                                                     |
|                        | Filled pasta                                                                  |
|                        | Paella                                                                        |
| <b>Sugar</b>           | White or brown sugar (cubes, powder)                                          |
| <b>Sweets</b>          | Chocolate (white, black, milk, praline)                                       |
|                        | Sweet or jelly candies                                                        |
|                        | Cocoa powder                                                                  |
| <b>Spreads</b>         | Jam, honey, maple syrup                                                       |
|                        | Chocolate spread                                                              |
|                        | Peanut butter, sesame paste                                                   |
| <b>Crackers</b>        | Aperitif biscuits, chips, crackers                                            |
| <b>Fried foods</b>     | Potatoes fried in deep-fat fryer, potato gratin                               |
|                        | Prepared fish breaded or fried                                                |
| <b>Pastries</b>        | Bakery items (e.g., croissants, chocolate-filled pastries)                    |
|                        | Pastries (e.g., cakes, apple turnovers, waffles)                              |
|                        | Pastries (e.g., eclairs, pancakes, tarts, buns)                               |
|                        | Biscuits, cereal bars                                                         |
|                        | Chocolate snacks (e.g., Twix, Snickers, cookies)                              |
| <b>Fruity desserts</b> | Compotes                                                                      |
|                        | Fruit in syrup (canned or jarred): pears, pineapples, lychees, fruit cocktail |
|                        | Fruit in syrup (canned or jarred): grapes, cherries, peaches, apricots        |

|                       |                                              |
|-----------------------|----------------------------------------------|
| <b>Dairy desserts</b> | Milk desserts (e.g., puddings, rice pudding) |
|                       | Gelatin-based desserts, custard, mousse      |
|                       | Ice cream or sorbet balls                    |
|                       | Ice cream with cookies or in a cone          |
| <b>Sauces</b>         | Hot sauces (e.g., pepper sauce)              |
|                       | Cold sauces (e.g., mayonnaise)               |
|                       | Light salad dressing                         |
|                       | Ketchup                                      |

**Figure S1. Study flowchart.**

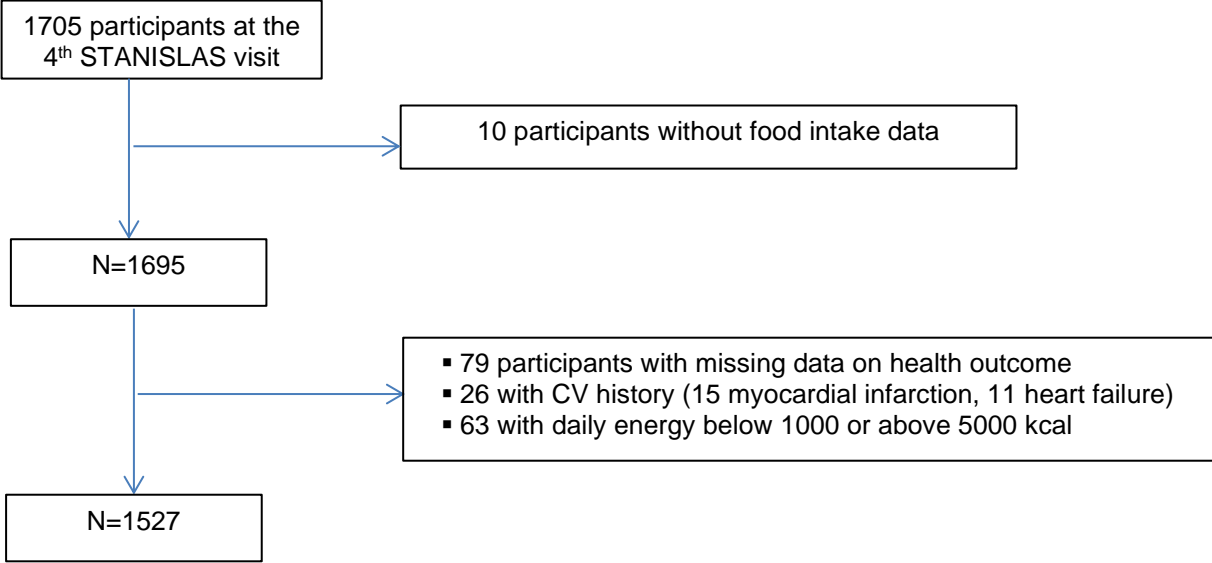

CV: cardiovascular
